# Supplementary material for: Impact of opioids on P2Y12 receptor inhibition in patients with ST-elevation myocardial infarction who are pre-treated with crushed ticagrelor: Opioids aNd crushed Ticagrelor In Myocardial infarction Evaluation (ON-TIME 3) trial
Source: PubMed Central journal article supplement — Eur Heart J Cardiovasc Pharmacother. 2020 Oct 29;8(1):4–12. doi: 10.1093/ehjcvp/pvaa095 (PMC8728016; doi:10.1093/ehjcvp/pvaa095), 2020-10-29
Supplement: pvaa095_supplementary_data.pdf [file pvaa095_supplementary_data.pdf]

1 **Supplementary tables:**

2  
3 **Table S1: Sensitivity analyses using multiple imputation and inter- and extrapolation**

| <b>Main outcomes with imputation</b>                  | <b>Acetaminophen<br/>N=98</b> | <b>Fentanyl<br/>N=97</b> | <b>P-value</b> |
|-------------------------------------------------------|-------------------------------|--------------------------|----------------|
| PRU at T2 (mean, SE)                                  | 126 (9.7)                     | 152 (10.2)               | 0.07           |
| PRU (mean, SE)                                        |                               |                          |                |
| T1                                                    | 155 (8.4)                     | 170 (7.7)                | 0.20           |
| T3                                                    | 61 (9.2)                      | 79 (11.2)                | 0.20           |
| T4                                                    | 29 (4.6)                      | 30 (4.7)                 | 0.87           |
| High platelet reactivity op T2 (%)                    | 24 (24.5)                     | 36 (36.9)                | 0.06           |
| Ticagrelor concentration (mean, SE)                   |                               |                          |                |
| T1                                                    | 371 (50.8)                    | 188 (31.7)               | 0.002          |
| T2                                                    | 509 (60.9)                    | 273 (36.5)               | 0.001          |
| T3                                                    | 657 (50.7)                    | 419 (32.3)               | <0.001         |
| T4                                                    | 439 (26.4)                    | 434 (36.6)               | 0.92           |
| Ticagrelor active metabolite concentration (mean, SE) |                               |                          |                |
| T1                                                    | 44 (7.3)                      | 21 (4.0)                 | 0.01           |
| T2                                                    | 75 (9.8)                      | 46.6 (7.4)               | 0.02           |
| T3                                                    | 144 (16.4)                    | 86 (7.8)                 | 0.001          |
| T4                                                    | 120 (7.4)                     | 434 (36.6)               | 0.85           |
| Ticagrelor concentration total (mean, SE)             |                               |                          |                |
| T1                                                    | 414 (56.4)                    | 209 (35.4)               | 0.002          |
| T2                                                    | 585 (69.0)                    | 319 (43.1)               | 0.001          |
| T3                                                    | 801 (63.1)                    | 504 (39.1)               | <0.001         |
| T4                                                    | 558 (32.0)                    | 556 (44.3)               | 0.96           |
| <b>Main outcome using inter- and extrapolation</b>    | <b>Acetaminophen<br/>N=98</b> | <b>Fentanyl<br/>N=97</b> | <b>P-value</b> |

|                            |              |              |      |
|----------------------------|--------------|--------------|------|
| PRU at T2 (median,<br>IQR) | 115 [45-191] | 171 [93-218] | 0.01 |
|----------------------------|--------------|--------------|------|

1  
2  
3  
4  
5  
6  
7  
8  
9  
10  
11  
12  
13  
14  
15  
16  
17  
18  
19  
20  
21  
22  
23  
24  
25  
26  
27  
28  
29  
30  
31  
32  
33  
34  
35  
36  
37  
38  
39  
40  
41  
42  
43  
44  
45  
46  
47  
48  
49  
50  
51  
52  
53  
54  
55  
56  
57  
58  
59  
60  
61  
62  
63  
64  
65

1 IQR: interquartile range; PRU: platelet reactivity units; T1: before primary PCI; T2:  
2 immediately after primary PCI; T3: 1-hour after primary PCI; T4: 6 hours after primary PCI  
3  
4

1 **Table S2: Post-hoc analysis of difference (delta) between PRU at T1 and T2, and T2 and**  
 2 **T3 and their ratios**

|                                      | <b>Acetaminophen</b>   | <b>Fentanyl</b>        | <b>P-value</b> |
|--------------------------------------|------------------------|------------------------|----------------|
| Delta PRU T1 and T2<br>(median, IQR) | -17 [-57 - 17]; n=84   | -5.5 [-51 - 20] n=76   | 0.31           |
| Delta PRU T2 and T3<br>(median, IQR) | -31 [-115 - -3]; n=72  | -38 [-134 - -1]; n=68  | 0.87           |
| Ratio PRU T1 and T2<br>(median, IQR) | 0.83 [0.51-1.09]; n=84 | 0.96 [0.43-1.10]; n=76 | 0.81           |
| Ratio PRU T2 and T3<br>(median, IQR) | 0.48 [0.12-0.91]; n=72 | 0.61 [0.16-0.97]; n=68 | 0.80           |

3 PRU: platelet reactivity units; T1: before primary PCI; T2: immediately after primary PCI;

4 T3: 1-hour after primary PCI

5

6

1 **Table S3: Post-hoc analysis of PRU and ticagrelor concentration in patients without**  
 2 **vomiting**

| No vomiting                                             | Acetaminophen<br>(N=95) | Fentanyl (N=83) | P-value |
|---------------------------------------------------------|-------------------------|-----------------|---------|
| PRU T1 (median, IQR)                                    | 165 [94-222]            | 193 [134-223]   | 0.13    |
| PRU T2 (median, IQR)                                    | 101 [36-206]            | 162 [49-218]    | 0.30    |
| PRU T3 (median, IQR)                                    | 27 [4-82]               | 49 [7-131]      | 0.21    |
| PRU T4 (median, IQR)                                    | 8 [3-29]                | 8 [4-39]        | 0.54    |
| Ticagrelor concentration T1<br>(median, IQR)            | 157 [33-525]            | 69 [13-228]     | 0.02    |
| Ticagrelor concentration T2<br>(median, IQR)            | 341 [99-805]            | 171 [37-380]    | 0.006   |
| Ticagrelor concentration T3<br>(median, IQR)            | 505 [312-987]           | 400 [134-660]   | 0.004   |
| Ticagrelor concentration T4<br>(median, IQR)            | 381 [225-580]           | 334 [222-580]   | 0.34    |
| Ticagrelor metabolite<br>concentration T1 (median, IQR) | 11 [0-51]               | 11 [0-20]       | 0.06    |
| Ticagrelor metabolite<br>concentration T2 (median, IQR) | 38 [5-105]              | 17 [3-59]       | 0.05    |
| Ticagrelor metabolite<br>concentration T3 (median, IQR) | 117 [42-201]            | 83 [17-129]     | 0.007   |
| Ticagrelor metabolite<br>concentration T4 (median, IQR) | 104 [79-157]            | 97 [53-159]     | 0.30    |

|                                                    |                |               |       |
|----------------------------------------------------|----------------|---------------|-------|
| Ticagrelor concentration total T1<br>(median, IQR) | 168 [35-589]   | 75 [13-255]   | 0.02  |
| Ticagrelor concentration total T2<br>(median, IQR) | 376 [109-933]  | 188 [39-438]  | 0.007 |
| Ticagrelor concentration total T3<br>(median, IQR) | 592 [370-1187] | 490 [150-803] | 0.005 |
| Ticagrelor concentration total T4<br>(median, IQR) | 517 [349-741]  | 452 [284-726] | 0.25  |

1 PRU: platelet reactivity units; T1: before primary PCI; T2: immediately after primary PCI;

2 T3: 1-hour after primary PCI; T4: 6 hours after primary PCI

3

4

5

1 **Table S4: Pain reduction stratified for TIMI 0 pre-PCI**

|                             |          | Acetaminophen | Fentanyl | P-value |
|-----------------------------|----------|---------------|----------|---------|
| <b>TIMI 0<br/>Pre-PCI</b>   | Pre-PCI  | 2 [1-3]       | 2 [1-4]  | 0.27    |
|                             | Post-PCI | 5 [4-7]       | 5 [4-7]  | 0.91    |
| <b>TIMI ≥ 1<br/>Pre-PCI</b> | Pre-PCI  | 3 [1-6]       | 2 [1-5]  | 0.71    |
|                             | Post-PCI | 5 [3-7]       | 5 [3-7]  | 0.65    |

2 PCI: percutaneous coronary intervention; TIMI: Thrombolysis In Myocardial Infarction

3  
4  
5  
6  
7  
8  
9  
10  
11  
12  
13  
14  
15  
16  
17  
18  
19  
20  
21  
22  
23  
24  
25  
26  
27  
28  
29  
30  
31  
32  
33  
34  
35  
36  
37  
38  
39  
40  
41  
42  
43  
44  
45  
46  
47  
48  
49  
50  
51  
52  
53  
54  
55  
56  
57  
58  
59  
60  
61  
62  
63  
64  
65
